# Supplementary material for: Insights into the molecular basis of long-term storage and survival of sperm in the honeybee (Apis mellifera)
Source: PubMed Central journal article supplement (PMC5238380; doi:10.1038/srep40236), 2017-01-16

# Insights into the molecular basis of long-term storage and survival of sperm in the honeybee (*Apis mellifera*)

## **Authors:**

Ellen Paynter <sup>1,2</sup>, . Harvey Millar <sup>1,2</sup>, Mat Welch <sup>1</sup>, Barbara Baer-Imhoof <sup>1</sup>, Danyang Cao <sup>1</sup>, Boris Baer <sup>1,2\*</sup>

<sup>1</sup> Centre for Integrative Bee Research (CIBER), Bayliss Building (M316), The University of Western Australia, 35 Stirling Highway, 6009 Crawley, Western Australia

<sup>2</sup> ARC Centre of Excellence in Plant Energy Biology, Bayliss Building (M316), The University of Western Australia, 35 Stirling Highway, 6009 Crawley, Western Australia

## **\*Corresponding Author**

Prof Boris Baer

Centre for Integrative Bee Research (CIBER), Bayliss Building (M316), the University of Western Australia, 35 Stirling Highway, 6009, Crawley, Western Australia

E-Mail: [boris.baer@uwa.edu.au](mailto:boris.baer@uwa.edu.au)

Tel: +61 8 6488 4495

## **Supplementary figure legends**

**Supplementary Figure 1.** Graph showing substrate-dependant aerobic metabolism and acidifying glycolytic metabolism of single honeybee ejaculates when incubated with different substrates. Error bars denote 1SE. GABA, gamma-aminobutyric acid; GA3P, glyceraldehyde-3-phosphate; G3P, glycerol-3-phosphate; 3PG, 3-phosphoglycerate.

**Supplementary Figure 2.** Substrate-dependant (A) aerobic metabolism and (B) acidifying glycolytic metabolism of honeybee sperm dissected from spermathecae when incubated with different substrates. Error bars denote 1SE. GA3P, glyceraldehyde-3-phosphate.

**Supplementary Figure 3.** Sperm viability following metabolic measurements of (A) ejaculated sperm and (B) sperm dissected from spermathecae. GA3P, glyceraldehyde-3-phosphate.

# Supplemental Figure 1

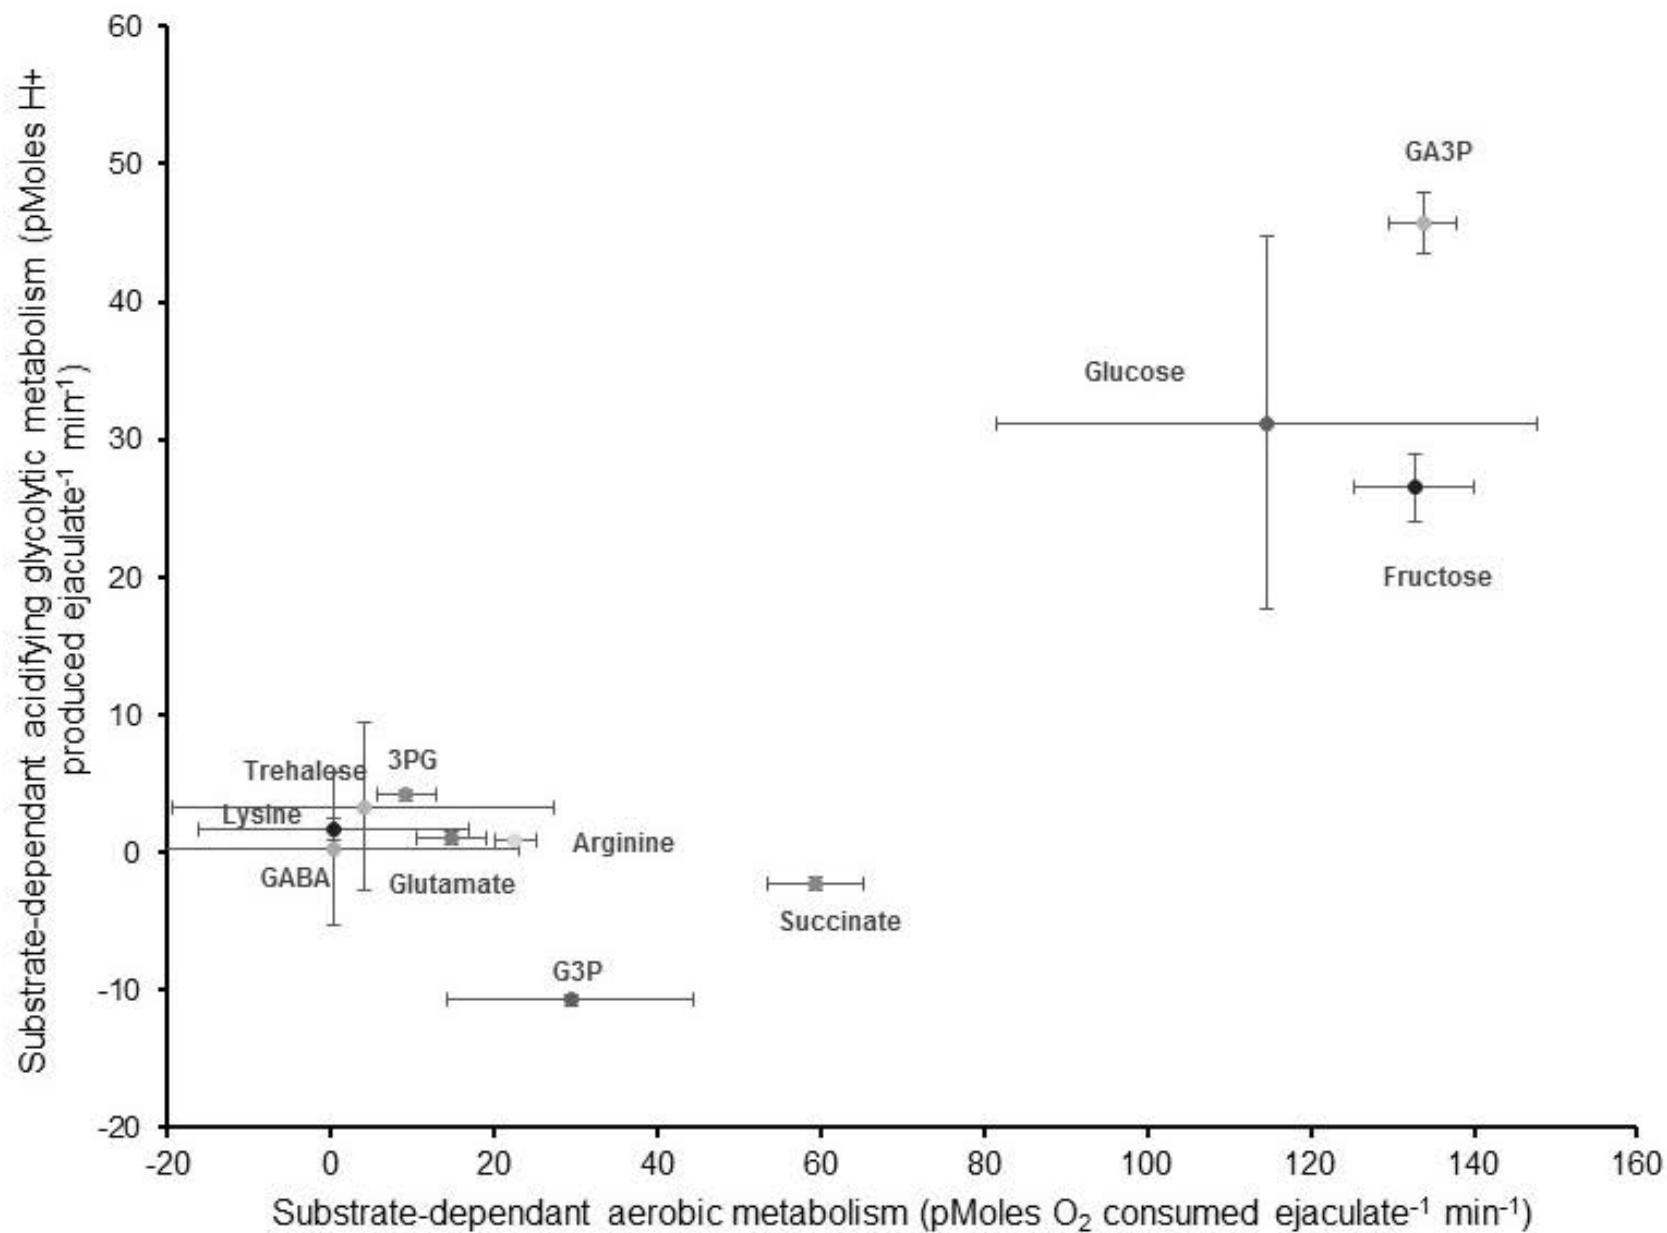

## Supplemental Figure 2

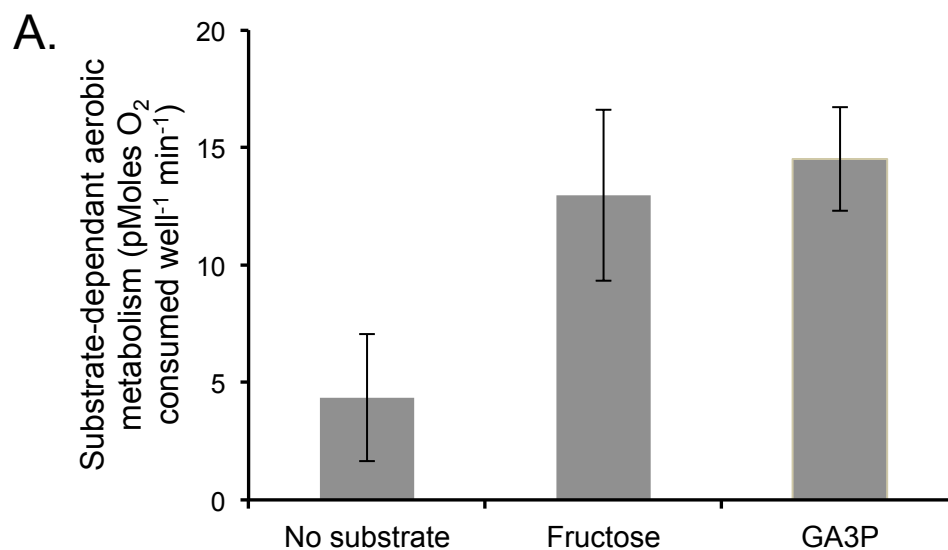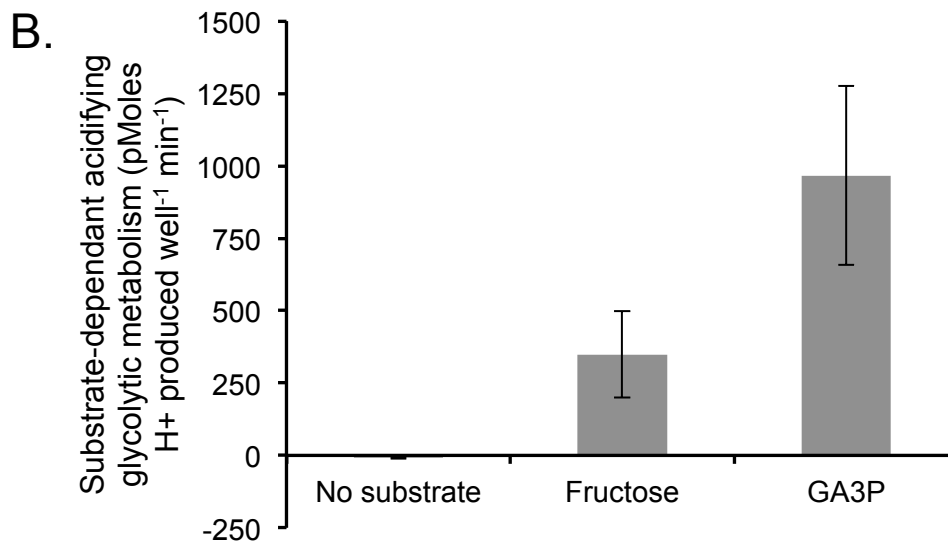

# Supplemental Figure 3

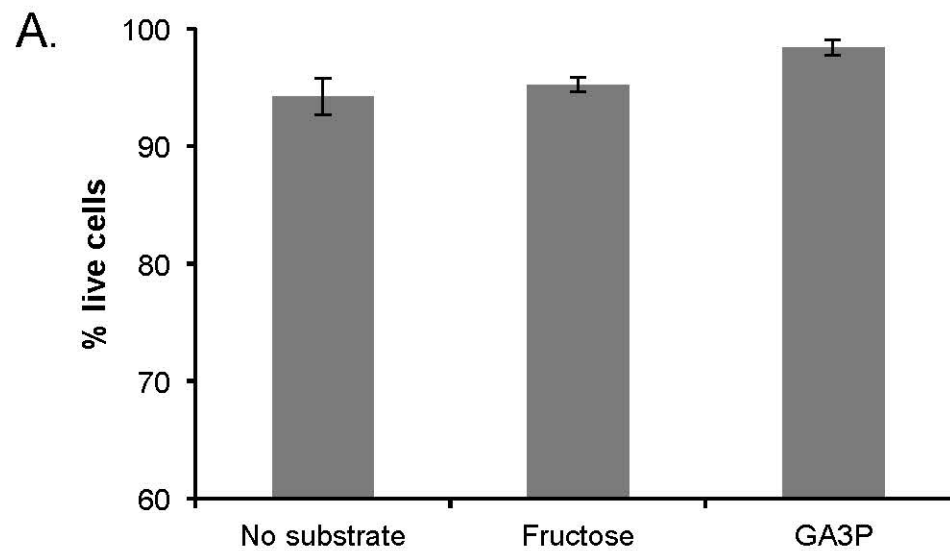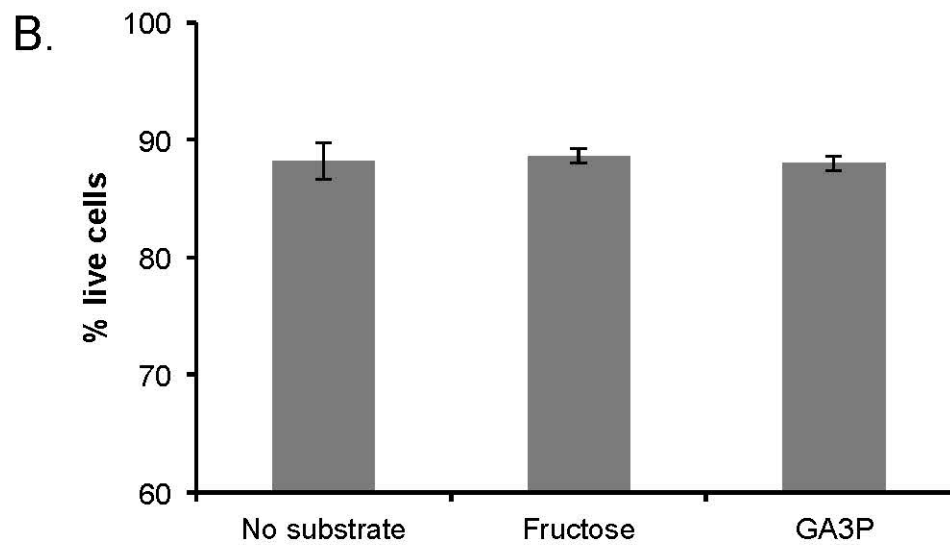

Supplement: srep40236-s1.pdf [file srep40236-s1.pdf]
